# Supplementary material for: Assessment of an Anticancer Effect of the Simultaneous Administration of MM-129 and Indoximod in the Colorectal Cancer Model
Source: MDPI journal article supplement (doi:10.3390/cancers16010122), 2023-12-26

# DLD-1

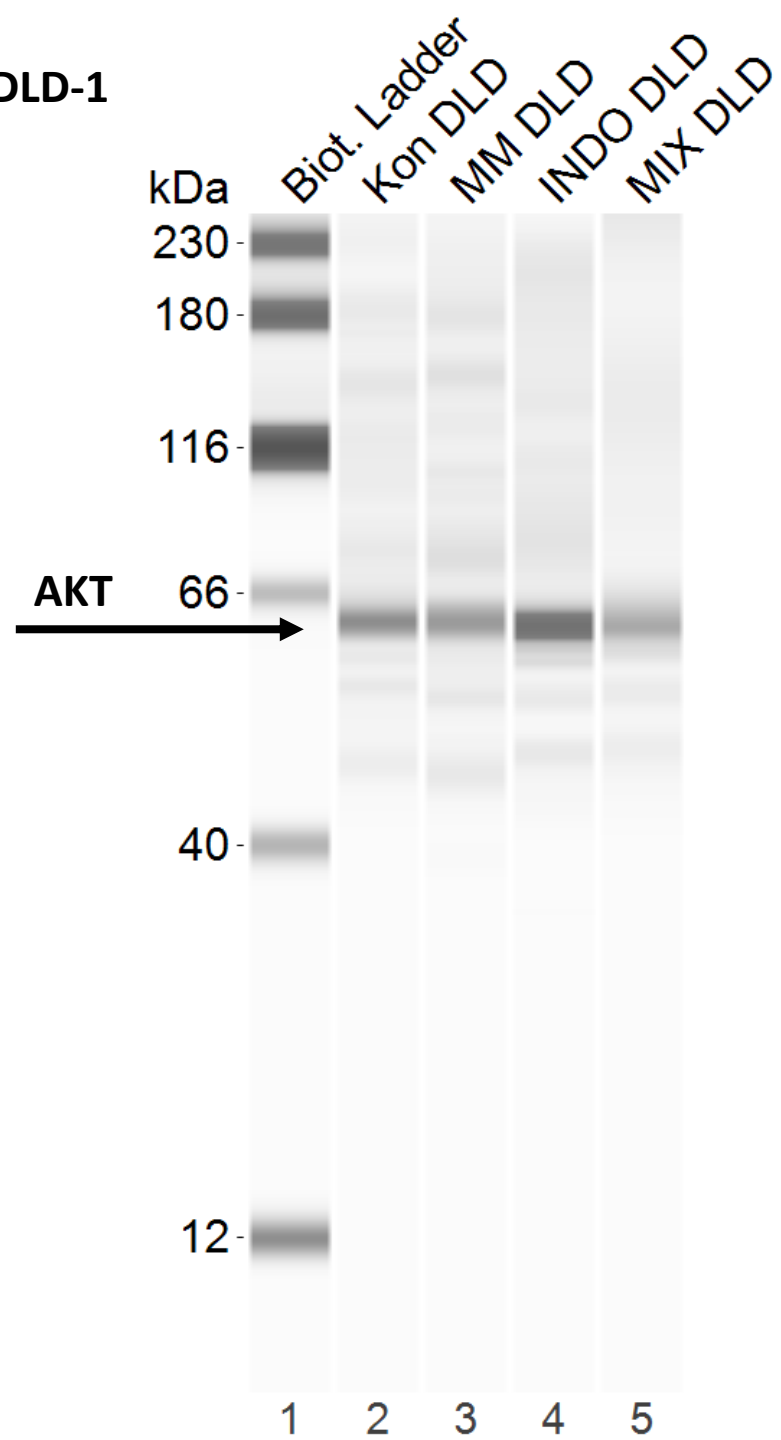

# HT-29

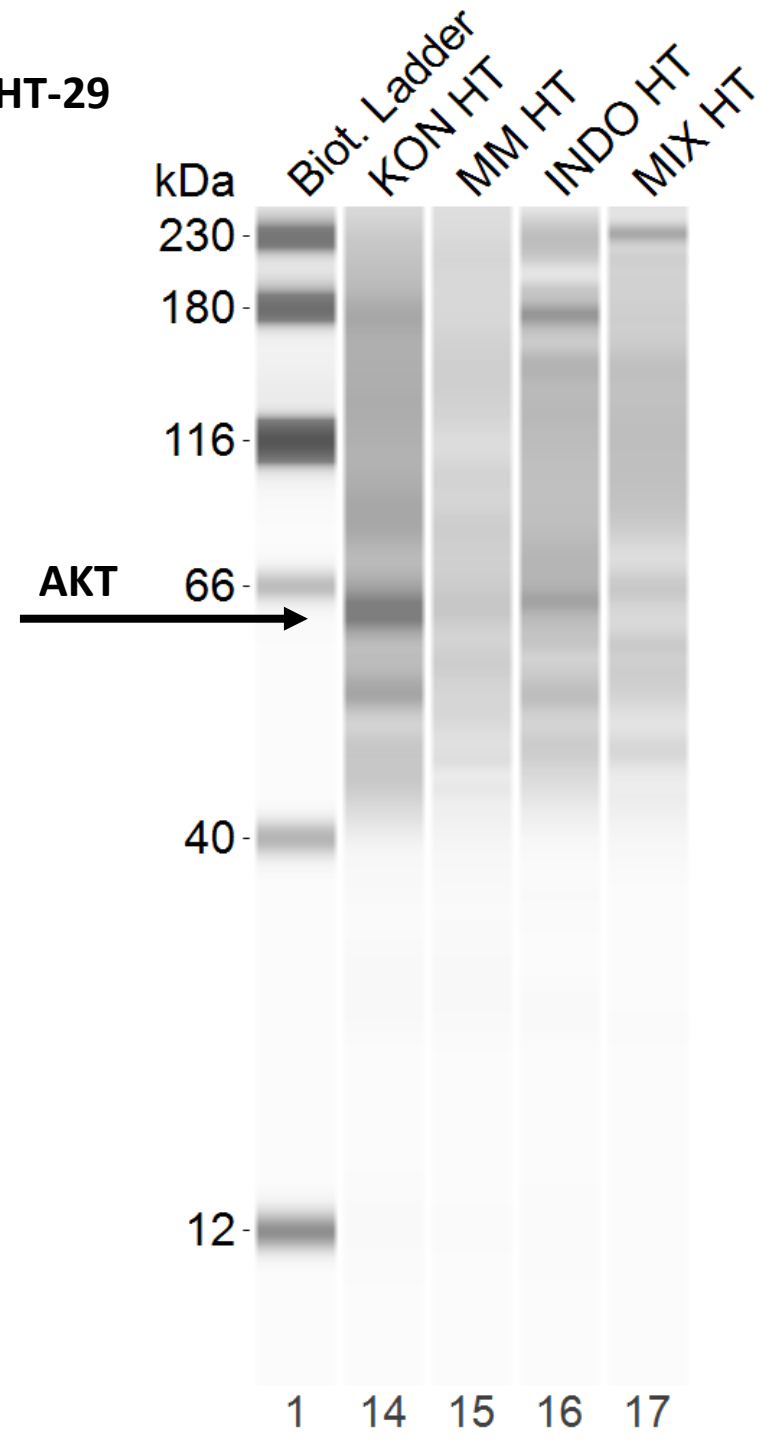

**AKT expression:**

**Order of loading:**

**Ladder**

**CON**

**MM-129**

**IND**

**MM-129+IND**

**DLD-1**

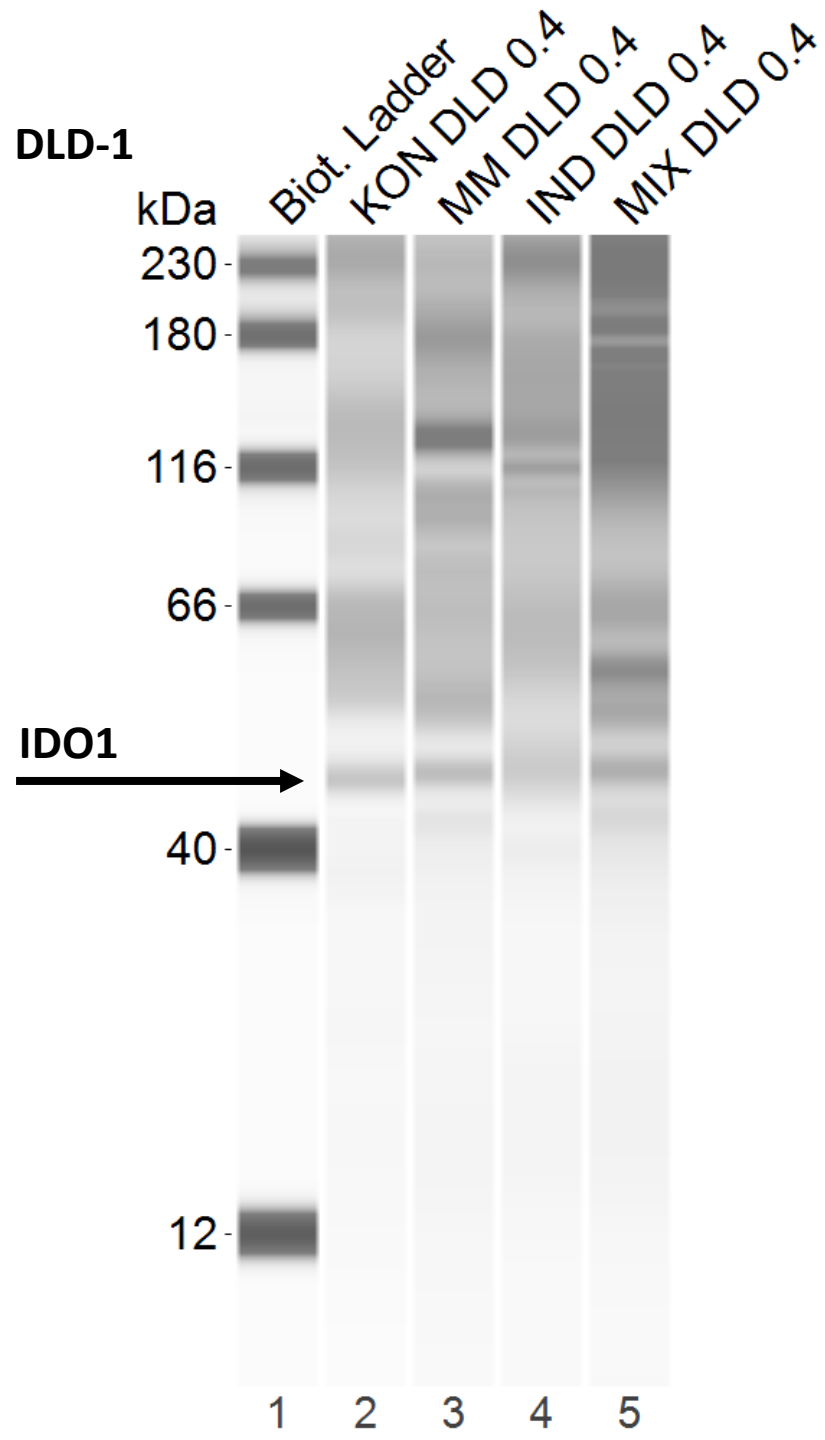

**HT-29**

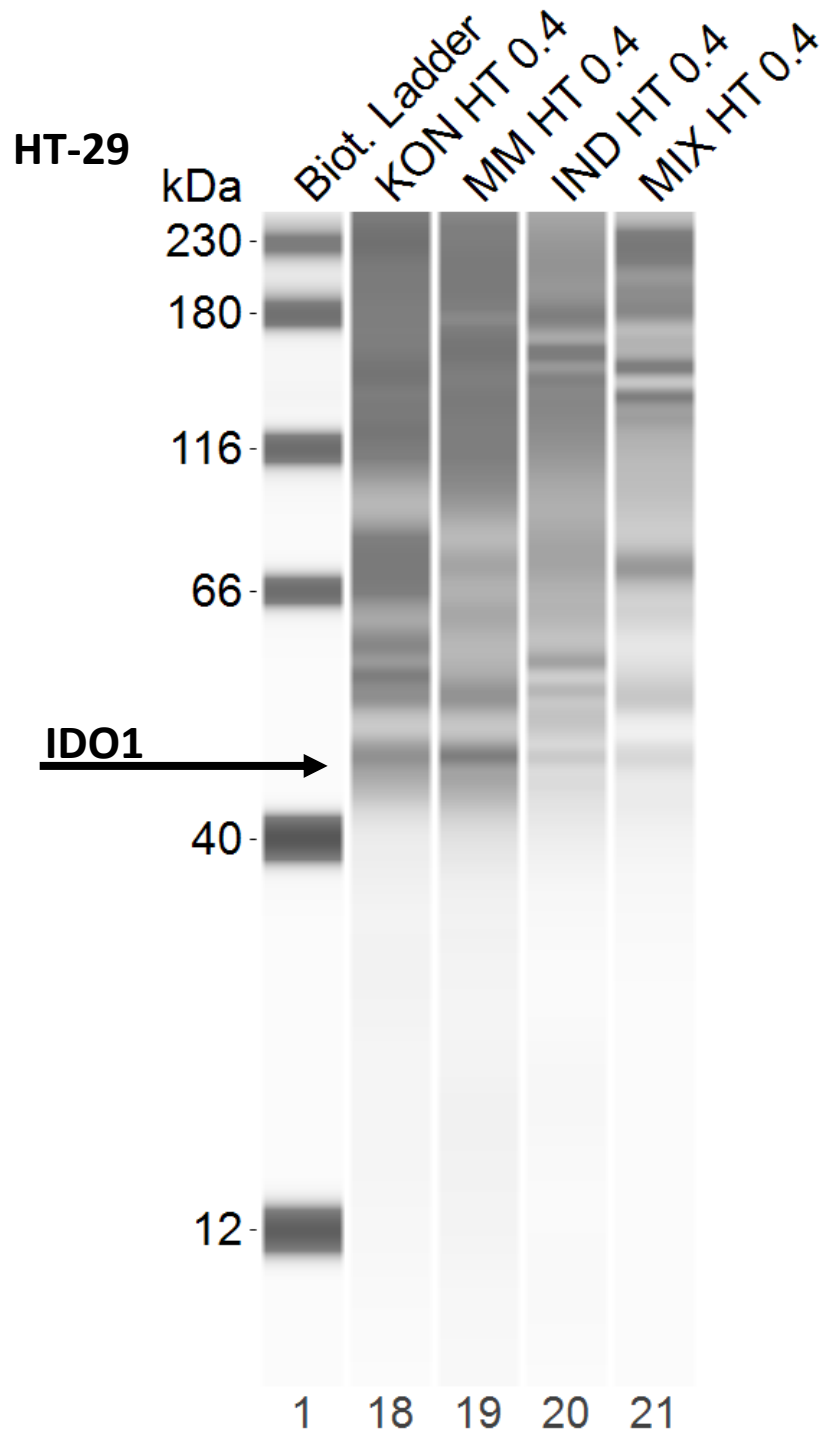

**IDO1 expression:**

**Order of loading**

**Ladder**

**CON**

**MM-129**

**IND**

**MM-129+IND**

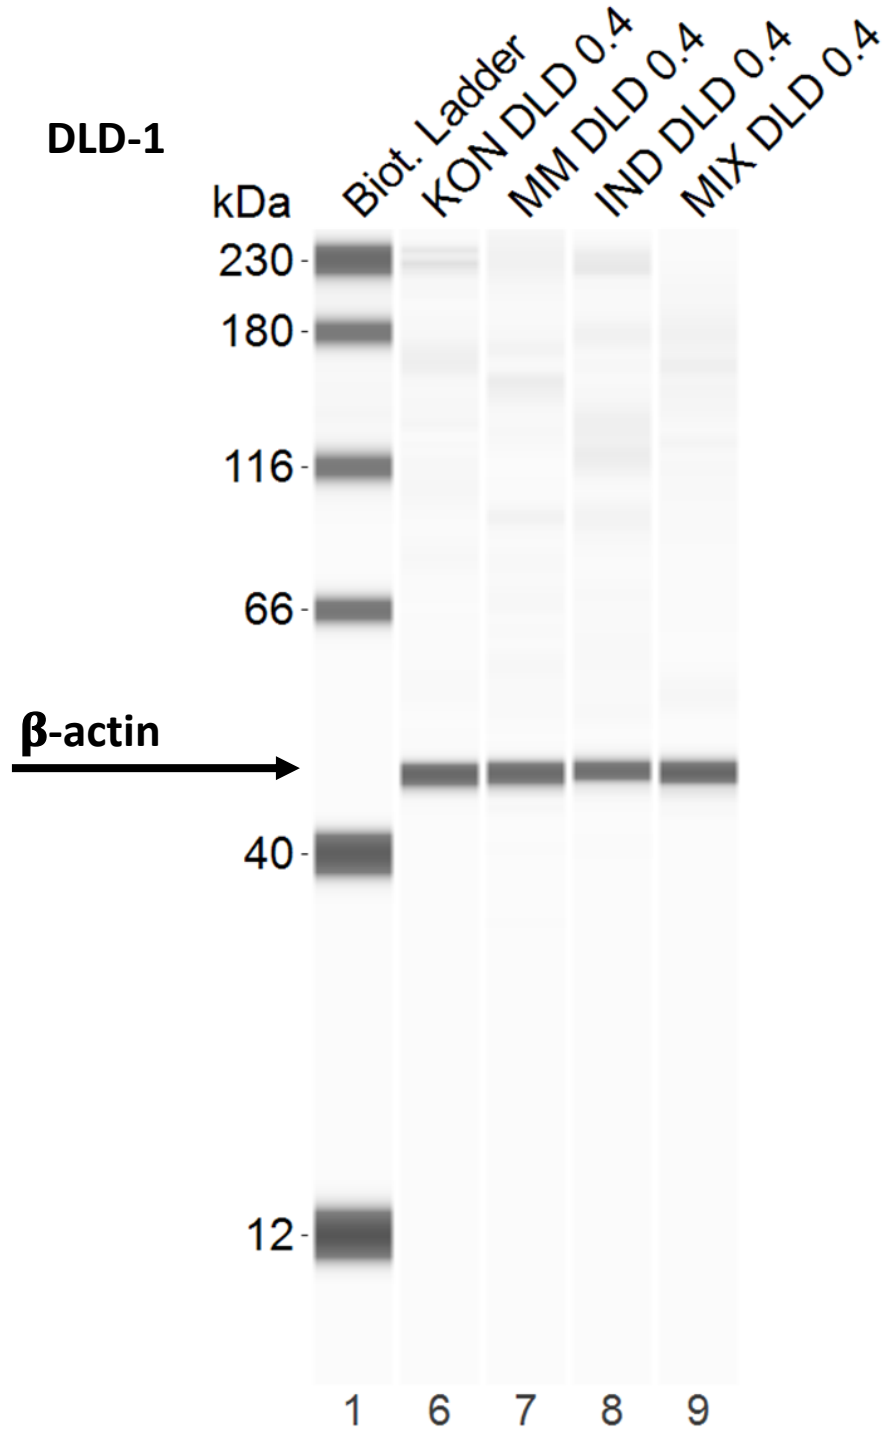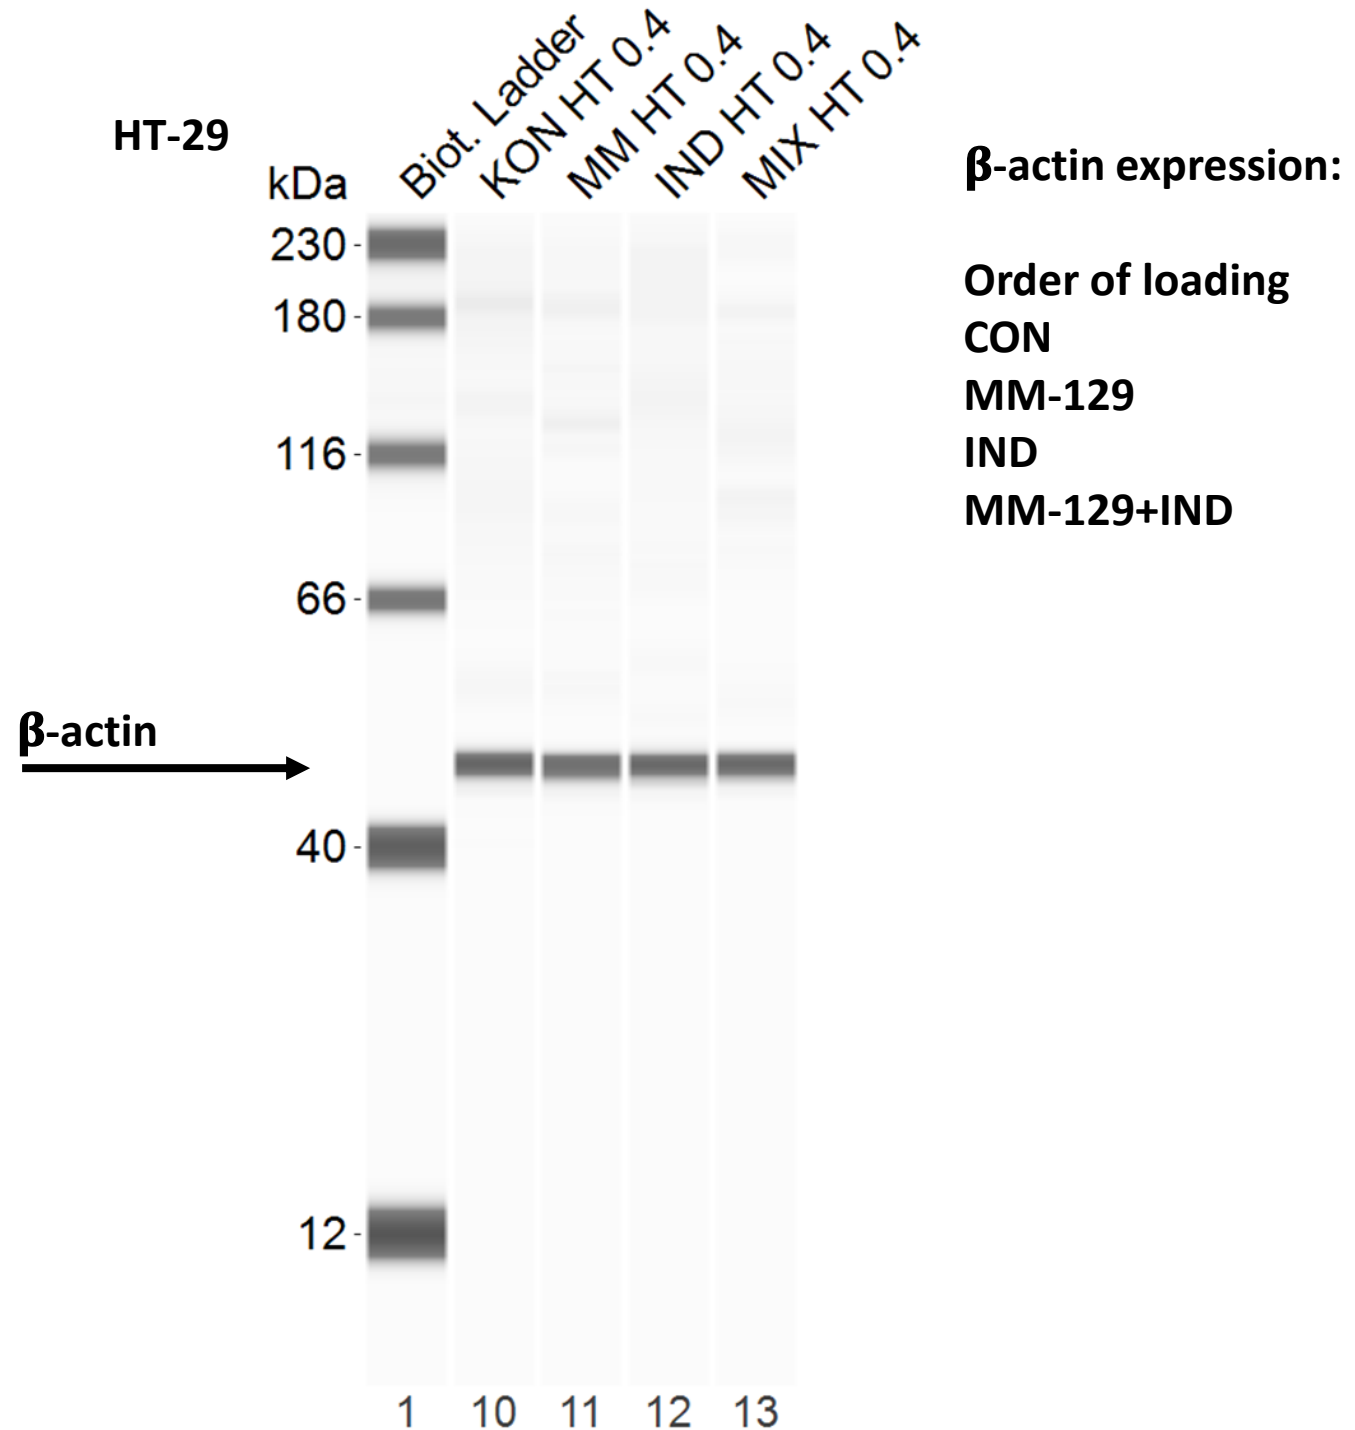

Supplement: s1 [file s1]
